# Supplementary material for: Mobile Phones: Reservoirs of Resistant Bacteria during the COVID-19 Pandemic in Abu Dhabi, United Arab Emirates
Source: MDPI journal article supplement (doi:10.3390/microorganisms11020523), 2023-02-18
Supplement: s1 [file s1]

**Supplementary Table S1.** Identified bacteria on participants' mobile surfaces. P= Present. NP= Not present.

| # of sample | <i>Staphylococcus aureus</i> | <i>Streptococcus</i> | <i>Enterococcus</i> | <i>Bacillus</i> | <i>Micrococcus</i> | <i>Coagulase-negative staphylococci (CONS)</i> | <i>E. coli</i> | <i>Citrobacter</i> | <i>Proteus</i> | <i>Klebsiella spp</i> | <i>Pseudomonas aeruginosa</i> | <i>Actinobacter</i> |
|-------------|------------------------------|----------------------|---------------------|-----------------|--------------------|------------------------------------------------|----------------|--------------------|----------------|-----------------------|-------------------------------|---------------------|
| 1           | P                            | NP                   | NP                  | NP              | NP                 | NP                                             | NP             | NP                 | NP             | NP                    | NP                            | NP                  |
| 2           | P                            | NP                   | NP                  | NP              | NP                 | NP                                             | NP             | NP                 | NP             | NP                    | NP                            | NP                  |
| 3           | P                            | NP                   | NP                  | NP              | NP                 | NP                                             | NP             | NP                 | NP             | NP                    | NP                            | NP                  |
| 4           | NP                           | P                    | P                   | NP              | NP                 | NP                                             | P              | NP                 | NP             | NP                    | NP                            | NP                  |
| 5           | P                            | NP                   | NP                  | NP              | NP                 | NP                                             | NP             | NP                 | NP             | NP                    | NP                            | NP                  |
| 6           | P                            | NP                   | NP                  | NP              | NP                 | NP                                             | NP             | P                  | P              | NP                    | NP                            | NP                  |
| 7           | P                            | NP                   | NP                  | NP              | NP                 | NP                                             | P              | NP                 | NP             | NP                    | NP                            | NP                  |
| 8           | P                            | NP                   | NP                  | NP              | NP                 | NP                                             | NP             | NP                 | NP             | NP                    | NP                            | NP                  |
| 9           | P                            | NP                   | NP                  | NP              | NP                 | NP                                             | NP             | NP                 | NP             | NP                    | NP                            | NP                  |
| 10          | P                            | NP                   | NP                  | NP              | NP                 | NP                                             | NP             | NP                 | NP             | NP                    | NP                            | NP                  |
| 11          | P                            | NP                   | NP                  | NP              | NP                 | NP                                             | NP             | NP                 | NP             | NP                    | NP                            | NP                  |
| 12          | NP                           | NP                   | NP                  | NP              | P                  | NP                                             | NP             | NP                 | NP             | NP                    | NP                            | NP                  |
| 13          | P                            | NP                   | NP                  | NP              | NP                 | NP                                             | NP             | NP                 | NP             | NP                    | NP                            | NP                  |
| 14          | NP                           | NP                   | NP                  | NP              | NP                 | P                                              | NP             | NP                 | NP             | NP                    | NP                            | NP                  |
| 15          | NP                           | NP                   | NP                  | NP              | P                  | NP                                             | P              | NP                 | NP             | NP                    | NP                            | NP                  |
| 16          | NP                           | P                    | P                   | NP              | NP                 | NP                                             | NP             | NP                 | NP             | NP                    | NP                            | NP                  |
| 17          | NP                           | NP                   | NP                  | P               | NP                 | NP                                             | NP             | NP                 | NP             | NP                    | NP                            | NP                  |
| 18          | P                            | NP                   | NP                  | NP              | NP                 | NP                                             | NP             | NP                 | NP             | NP                    | NP                            | NP                  |
| 19          | P                            | NP                   | NP                  | NP              | NP                 | NP                                             | NP             | NP                 | NP             | NP                    | NP                            | NP                  |
| 20          | P                            | NP                   | NP                  | NP              | NP                 | NP                                             | NP             | NP                 | NP             | NP                    | NP                            | NP                  |
| 21          | NP                           | NP                   | NP                  | NP              | P                  | NP                                             | NP             | NP                 | NP             | P                     | P                             | P                   |

|    |    |    |    |    |    |    |    |    |    |    |    |    |
|----|----|----|----|----|----|----|----|----|----|----|----|----|
| 22 | NP | P  | P  | NP |
| 23 | NP | NP | NP | NP | P  | NP | NP | P  | P  | NP | NP | NP |
| 24 | P  | NP |
| 25 | P  | NP | NP | P  | NP | NP | P  | NP | NP | NP | NP | NP |
| 26 | NP | NP | NP | NP | NP | P  | NP | NP | NP | NP | NP | NP |
| 27 | NP | P  | P  | NP | NP | NP | P  | NP | NP | NP | NP | NP |
| 28 | P  | NP |
| 29 | P  | NP |
| 30 | NP | P  | P  | NP | NP | NP | P  | NP | NP | NP | NP | NP |
| 31 | P  | NP | NP | P  | NP |
| 32 | NP | NP | NP | NP | NP | P  | NP | NP | NP | NP | NP | NP |
| 33 | NP | NP | NP | NP | NP | P  | P  | NP | NP | NP | NP | NP |
| 34 | NP | NP | NP | NP | NP | P  | NP | NP | NP | NP | NP | NP |
| 35 | NP | NP | NP | NP | NP | P  | P  | NP | NP | NP | NP | NP |
| 36 | P  | NP |
| 37 | NP | NP | NP | NP | NP | P  | NP | NP | NP | NP | NP | NP |
| 38 | P  | NP | NP | P  | NP |
| 39 | NP | NP | NP | NP | P  | NP |
| 40 | NP | P  | P  | NP |
| 41 | NP | NP | NP | NP | NP | P  | P  | NP | NP | NP | NP | NP |
| 42 | NP | NP | NP | NP | NP | P  | NP | NP | NP | NP | NP | NP |
| 43 | NP | NP | NP | NP | NP | P  | NP | NP | NP | P  | P  | P  |
| 44 | NP | P  | NP |
| 45 | P  | NP | NP | P  | NP |
| 46 | NP | NP | NP | NP | P  | NP | NP | P  | P  | NP | NP | NP |
| 47 | NP | P  | NP |
| 48 | NP | NP | NP | NP | NP | P  | NP | NP | NP | NP | NP | NP |

|    |    |    |    |    |    |    |    |    |    |    |    |    |
|----|----|----|----|----|----|----|----|----|----|----|----|----|
| 49 | NP | P  | P  | NP | NP | NP | P  | NP | NP | NP | NP | NP |
| 50 | NP | NP | NP | NP | NP | P  | NP | NP | NP | NP | NP | NP |
| 51 | NP | NP | NP | NP | NP | P  | NP | NP | NP | NP | NP | NP |
| 52 | NP | NP | NP | NP | NP | P  | NP | NP | NP | NP | NP | NP |
| 53 | P  | NP | NP | P  | NP | NP | NP | NP | NP | P  | P  | P  |
| 54 | NP | NP | NP | NP | NP | P  | NP | P  | P  | NP | NP | NP |
| 55 | NP | NP | NP | NP | NP | P  | NP | NP | NP | NP | NP | NP |
| 56 | NP | NP | NP | NP | P  | NP | NP | P  | P  | NP | NP | NP |
| 57 | NP | NP | NP | NP | NP | P  | NP | NP | NP | P  | NP | NP |
| 58 | NP | NP | NP | NP | P  | NP | NP | P  | P  | NP | NP | NP |
| 59 | P  | NP | NP | P  | NP | NP | NP | P  | P  | NP | NP | NP |
| 60 | NP | P  | NP | NP | NP | NP | NP | P  | P  | NP | NP | NP |
| 61 | NP | NP | NP | NP | NP | P  | NP | NP | NP | NP | NP | NP |
| 62 | NP | NP | NP | NP | P  | NP |
| 63 | P  | NP |
| 64 | NP | NP | NP | NP | NP | P  | NP | NP | NP | P  | P  | P  |
| 65 | P  | NP | NP | P  | NP | NP | P  | NP | NP | NP | NP | NP |
| 66 | NP | NP | NP | NP | P  | NP |
| 67 | NP | NP | NP | NP | P  | NP | P  | NP | NP | NP | NP | NP |
| 68 | NP | P  | NP | NP | NP | NP | P  | NP | NP | NP | NP | NP |
| 69 | P  | NP | NP | P  | NP |
| 70 | P  | NP | NP | P  | NP | NP | NP | P  | P  | NP | NP | NP |
| 71 | NP | NP | NP | NP | P  | NP | NP | P  | P  | NP | NP | NP |
| 72 | P  | NP | NP | P  | NP | NP | NP | P  | P  | NP | NP | NP |
| 73 | NP | NP | NP | NP | NP | P  | NP | NP | NP | NP | NP | NP |
| 74 | P  | NP | NP | P  | NP |
| 75 | NP | NP | NP | NP | P  | NP |

|     |    |    |    |    |    |    |    |    |    |    |    |    |
|-----|----|----|----|----|----|----|----|----|----|----|----|----|
| 76  | P  | NP | NP | P  | NP |
| 77  | P  | NP |
| 78  | NP | P  | NP | NP | NP | NP | P  | NP | NP | NP | NP | NP |
| 79  | NP | P  | NP |
| 80  | NP | NP | NP | NP | P  | NP |
| 81  | NP | NP | NP | NP | NP | P  | NP | NP | NP | NP | NP | NP |
| 82  | P  | NP |
| 83  | NP | NP | NP | NP | P  | NP | P  | NP | NP | NP | NP | NP |
| 84  | NP | NP | NP | NP | P  | NP | P  | NP | NP | NP | NP | NP |
| 85  | P  | NP |
| 86  | NP | P  | P  | NP |
| 87  | P  | NP |
| 88  | NP | NP | NP | NP | P  | NP |
| 89  | NP | NP | NP | NP | P  | NP | P  | NP | NP | NP | NP | NP |
| 90  | NP | NP | NP | NP | P  | NP | NP | NP | NP | NP | NP | P  |
| 91  | NP | NP | NP | NP | P  | NP | NP | NP | NP | NP | NP | P  |
| 92  | NP | NP | NP | NP | NP | P  | P  | NP | NP | NP | NP | NP |
| 93  | NP | NP | NP | NP | P  | NP |
| 94  | NP | NP | NP | NP | NP | P  | NP | NP | NP | NP | NP | NP |
| 95  | P  | NP | NP | P  | NP | NP | NP | P  | P  | NP | NP | NP |
| 96  | NP | NP | NP | NP | P  | NP | NP | P  | P  | NP | NP | NP |
| 97  | NP | NP | NP | NP | NP | P  | NP | P  | P  | NP | NP | NP |
| 98  | NP | NP | NP | NP | P  | NP |
| 99  | NP |
| 100 | NP | NP | NP | P  | NP |
| 101 | NP | P  | P  | NP | NP | NP | P  | NP | NP | NP | NP | NP |
| 102 | NP | P  | P  | NP | NP | NP | P  | NP | NP | NP | NP | NP |

**Supplementary Table S2.** Antibiotic resistance distribution among participants. S= sensitive. R= resistant.

| # of sample | Ciprofloxacin | Cefotaxime | Ampicillin | Gentamicin | Ceftazidime |
|-------------|---------------|------------|------------|------------|-------------|
| 1           | S             | R          | R          | S          | R           |
| 2           | S             | S          | S          | S          | R           |
| 3           | S             | S          | S          | S          | R           |
| 4           | S             | S          | R          | S          | S           |
| 5           | S             | R          | R          | S          | R           |
| 6           | S             | R          | S          | S          | R           |
| 7           | S             | S          | S          | S          | R           |
| 8           | S             | R          | R          | S          | R           |
| 9           | S             | S          | R          | S          | S           |
| 10          | S             | S          | R          | R          | S           |
| 11          | S             | S          | S          | S          | R           |
| 12          | S             | S          | S          | S          | R           |
| 13          | S             | S          | S          | S          | S           |
| 14          | S             | S          | S          | S          | S           |
| 15          | S             | S          | R          | S          | S           |
| 16          | S             | S          | R          | S          | R           |
| 17          | S             | S          | S          | S          | R           |
| 18          | S             | S          | R          | S          | R           |
| 19          | S             | R          | R          | S          | R           |
| 20          | S             | R          | R          | S          | R           |
| 21          | S             | R          | S          | S          | R           |
| 22          | S             | S          | S          | S          | R           |
| 23          | S             | S          | R          | S          | S           |
| 24          | S             | S          | R          | S          | R           |

|    |   |   |   |   |   |
|----|---|---|---|---|---|
| 25 | S | R | S | S | S |
| 26 | S | R | R | S | R |
| 27 | S | S | R | S | S |
| 28 | S | R | R | S | R |
| 29 | S | R | S | S | R |
| 30 | S | R | R | S | R |
| 31 | S | S | S | S | S |
| 32 | S | S | S | S | S |
| 33 | S | S | R | S | S |
| 34 | S | S | S | S | S |
| 35 | S | S | R | S | R |
| 36 | S | S | S | S | S |
| 37 | S | R | R | S | R |
| 38 | S | R | R | S | R |
| 39 | S | S | S | S | S |
| 40 | S | S | S | S | S |
| 41 | S | S | S | S | R |
| 42 | S | R | R | S | R |
| 43 | S | S | R | S | S |
| 44 | S | R | R | S | R |
| 45 | S | R | R | S | S |
| 46 | S | R | R | S | R |
| 47 | S | R | R | S | R |
| 48 | S | S | S | S | R |
| 49 | S | S | S | S | R |
| 50 | S | S | R | S | S |
| 51 | S | S | S | S | S |
| 52 | S | S | R | S | S |
| 53 | S | R | R | S | R |

|    |   |   |   |   |   |
|----|---|---|---|---|---|
| 54 | S | S | R | S | S |
| 55 | S | R | R | S | R |
| 56 | S | R | R | S | R |
| 57 | S | S | S | S | S |
| 58 | S | S | S | S | S |
| 59 | S | R | R | S | R |
| 60 | S | R | R | S | R |
| 61 | S | R | R | S | R |
| 62 | S | R | R | S | R |
| 63 | S | S | R | S | S |
| 64 | S | R | R | S | R |
| 65 | S | R | R | S | R |
| 66 | S | S | S | S | S |
| 67 | S | R | R | S | R |
| 68 | S | R | R | S | R |
| 69 | S | S | S | S | S |
| 70 | S | S | R | S | R |
| 71 | S | S | S | S | S |
| 72 | S | R | R | S | R |
| 73 | S | S | S | S | S |
| 74 | S | R | R | S | R |
| 75 | S | R | R | S | R |
| 76 | S | R | R | S | R |
| 77 | S | R | R | S | R |
| 78 | S | R | R | S | R |
| 79 | S | R | R | S | R |
| 80 | S | S | S | S | S |
| 81 | S | S | R | S | S |
| 82 | S | R | S | S | R |

|     |   |   |   |   |   |
|-----|---|---|---|---|---|
| 83  | S | S | R | S | S |
| 84  | S | S | S | S | S |
| 85  | S | R | R | S | S |
| 86  | S | S | R | S | S |
| 87  | S | S | R | S | S |
| 88  | S | S | R | S | S |
| 89  | S | S | R | S | S |
| 90  | S | S | R | S | R |
| 91  | S | S | R | S | S |
| 92  | S | S | R | S | S |
| 93  | S | R | R | S | R |
| 94  | S | S | R | S | S |
| 95  | S | S | R | S | S |
| 96  | S | S | R | S | S |
| 97  | S | R | R | S | R |
| 98  | S | R | R | S | R |
| 99  | S | R | R | S | R |
| 100 | S | R | R | S | R |
| 101 | S | R | R | S | R |
| 102 | S | R | R | S | R |
